# Supplementary material for: Association between Endothelial Activation and Stress Index and mortality in coronary heart disease ICU patients: A retrospective cohort study
Source: Research Square preprint supplement (doi:10.21203/rs.3.rs-8191194/v1), 2025-12-12
Supplement: Supplementary file 1 [file 771f3f133803bed7069f97a8.docx]

**Supplementary Material**

**List of Supplementary Tables and Figures**

**Table S1.** Comparisons between survivors and non-survivors based on 90-day outcomes.

**Table S2.** Comparisons between survivors and non-survivors based on 365-day outcomes.

**Figure S1.** Kaplan-Meier survival curves comparing EASIX tertiles within 90 days after admission.

**Figure S**2. Restricted cubic spline analysis of EASIX and 90-day all-cause mortality in critically ill CHD based on Cox proportional hazards model 3.

**Figure S3.** Subgroup analysis forest plots for 90-day mortality.

TableS1. Comparisons between survivors and non-survivors based on 90-day outcomes

| **Characteristics** | **Overall (n = 2468)** | **Survivors**  **(n = 1909)** | **Non-survivors**  **(n = 559)** | ***p*.value** |
| --- | --- | --- | --- | --- |
| Age | 73 (64-81) | 72 (63-81) | 76 (68-82) | <0.001 |
| Sex (%) |  |  |  |  |
| Female | 836 (33.87) | 630 (33.00) | 206 (36.85) | 0.101 |
| Male | 1632 (66.13) | 1279 (67.00) | 353 (63.15) |  |
| Race (%) |  |  |  |  |
| Black | 154 (6.24) | 115 (6.02) | 39 (6.98) | 0.349 |
| White | 2039 (82.62) | 1573 (82.40) | 466 (83.36) |  |
| Others | 275 (11.14) | 221 (11.58) | 54 (9.66) |  |
| BMI | 27.682 (24.251-31.831) | 27.777 (24.36-31.807) | 27.287 (23.933-31.929) | 0.078 |
| Comorbidities |  |  |  |  |
| Respiratory failure (%) | 1137 (46.07) | 745 (39.03) | 392 (70.13) | <0.001 |
| Arterial fibrillation (%) | 1090 (44.17) | 810 (42.43) | 280 (50.09) | 0.002 |
| Hypertension (%) | 900 (36.47) | 731 (38.29) | 169 (30.23) | 0.001 |
| AKI (%) | 1244 (50.41) | 837 (43.84) | 407 (72.81) | <0.001 |
| Stroke (%) | 249 (10.09) | 200 (10.48) | 49 (8.77) | 0.271 |
| T2DM (%) | 963 (39.02) | 729 (38.19) | 234 (41.86) | 0.129 |
| Heart failure (%) | 1310 (53.08) | 982 (51.44) | 328 (58.68) | 0.003 |
| Myocardial infarction (%) | 856 (34.68) | 656 (34.36) | 200 (35.78) | 0.570 |
| illness severity scores |  |  |  |  |
| SOFA | 6 (3-9) | 5 (3-8) | 8 (5-11) | <0.001 |
| APSIII | 47 (35-62) | 43 (32-55) | 63 (49-79) | <0.001 |
| SAPSII | 40 (32-50) | 37 (31-46) | 48 (40-59) | <0.001 |
| OASIS | 34 (28-40) | 32 (27-38) | 39 (32-45) | <0.001 |
| Laboratory tests |  |  |  |  |
| Hemoglobin(g/dL) | 10.4 (8.97-11.972) | 10.55 (9.1-12.1) | 9.85 (8.5-11.425) | <0.001 |
| RBC (×106/µL) | 3.47 (3.03-4.02) | 3.51 (3.08-4.07) | 3.33 (2.865-3.875) | <0.001 |
| WBC (×103/µL) | 11.4 (8.5-15.6) | 11.12 (8.4-15.05) | 12.63 (8.835-17.69) | <0.001 |
| INR | 1.3 (1.17-1.57) | 1.27 (1.15-1.5) | 1.45 (1.2-1.9) | <0.001 |
| PT(sec) | 14.24 (12.8-17.135) | 14 (12.7-16.3) | 15.85 (13.4-20.77) | <0.001 |
| APTT(sec) | 36 (29.26-54.83) | 35.125 (28.95-53.1) | 38.1 (30.175-62.015) | <0.001 |
| FBG (mg/dL) | 135.33 (112-176) | 132 (111-169.625) | 148 (119-193) | <0.001 |
| Potassium (mEq/L) | 4.17 (3.87-4.53) | 4.15 (3.87-4.5) | 4.25 (3.87-4.64) | 0.001 |
| Sodium (mEq/L) | 138.5 (135.67-141) | 138.5 (136-141) | 138.33 (134.67-141.33) | 0.154 |
| Serum creatinine(mg/dL) | 1.2 (0.87-1.77) | 1.1 (0.85-1.6) | 1.53 (1.04-2.33) | <0.001 |
| EASIX | 1.129 (0.206-2.089) | 0.917 (0.09-1.823) | 1.9 (0.922-2.826) | <0.001 |
| LDH(U/L) | 296 (219-435) | 280 (207-393) | 388 (271-557.5) | <0.001 |
| Platelet(×103/µL) | 180 (133-237) | 180.8 (136.5-235) | 175 (121.215-241.75) | 0.212 |
| **Therapeutic** |  |  |  |  |
| Invasive ventilation (%) | 2212 (89.63) | 1705 (89.31) | 507 (90.70) | 0.387 |
| Antihypertensive drugs(%) | 2107 (85.37) | 1658 (86.85) | 449 (80.32) | <0.001 |
| Glucocorticoid(%) | 647 (26.22) | 426 (22.32) | 221 (39.53) | <0.001 |

Data are presented as median (IQR) or frequencies (percentages). Abbreviation: EASIX, Endothelial Activation and Stress Index; BMI, body mass index; AKI, acute kidney injury; T2DM, type 2 diabetes mellitus; RBC, red blood cell; WBC, white blood cells; INR, international normalized ratio; PT, prothrombin time; APTT, activated partial thromboplastin time; FBG, fasting blood glucose; LDH, lactate dehydrogenase; SOFA, sequential organ failure assessment; SAPS II, simplified acute physiological score II; APS III, acute physiology score III; OASIS, oxford acute severity of illness score.

TableS2. Comparisons between survivors and non-survivors based on 365-day outcomes

| **Characteristics** | **Overall (n = 2468)** | **Survivors**  **(n = 1876)** | **Non-survivors**  **(n = 592)** | ***p*.value** |
| --- | --- | --- | --- | --- |
| Age | 73 (64-81) | 72 (63-81) | 76 (67-82) | <0.001 |
| Sex (%) |  |  |  |  |
| Female | 836 (33.87) | 616 (32.84) | 220 (37.16) | 0.059 |
| Male | 1632 (66.13) | 1260 (67.16) | 372 (62.84) |  |
| Race (%) |  |  |  |  |
| Black | 154 (6.24) | 109 (5.81) | 45 (7.60) | 0.194 |
| White | 2039 (82.62) | 1551 (82.68) | 488 (82.43) |  |
| Others | 275 (11.14) | 216 (11.51) | 59 (9.97) |  |
| BMI | 27.682 (24.251-31.831) | 27.776 (24.372-31.803) | 27.295 (23.886-31.949) | 0.062 |
| Comorbidities |  |  |  |  |
| Respiratory failure (%) | 1137 (46.07) | 729 (38.86) | 408 (68.92) | <0.001 |
| Arterial fibrillation (%) | 1090 (44.17) | 793 (42.27) | 297 (50.17) | 0.001 |
| Hypertension (%) | 900 (36.47) | 722 (38.49) | 178 (30.07) | <0.001 |
| AKI (%) | 1244 (50.41) | 813 (43.34) | 431 (72.80) | <0.001 |
| Stroke (%) | 249 (10.09) | 197 (10.50) | 52 (8.78) | 0.258 |
| T2DM (%) | 963 (39.02) | 708 (37.74) | 255 (43.07) | 0.023 |
| Heart failure (%) | 1310 (53.08) | 958 (51.07) | 352 (59.46) | <0.001 |
| Myocardial infarction (%) | 856 (34.68) | 644 (34.33) | 212 (35.81) | 0.541 |
| illness severity scores |  |  |  |  |
| SOFA | 6 (3-9) | 5 (3-8) | 8 (5-11) | <0.001 |
| APSIII | 47 (35-62) | 43 (32-55) | 62 (49-79) | <0.001 |
| SAPSII | 40 (32-50) | 37 (30-46) | 48 (40-59) | <0.001 |
| OASIS | 34 (28-40) | 32 (27-38) | 39 (32-45) | <0.001 |
| Laboratory tests |  |  |  |  |
| Hemoglobin(g/dL) | 10.4 (8.97-11.972) | 10.58 (9.127-12.15) | 9.875 (8.5-11.362) | <0.001 |
| RBC (×106/µL) | 3.47 (3.03-4.02) | 3.53 (3.09-4.08) | 3.32 (2.86-3.86) | <0.001 |
| WBC (×103/µL) | 11.4 (8.5-15.6) | 11.15 (8.43-15.07) | 12.37 (8.728-17.515) | <0.001 |
| INR | 1.3 (1.17-1.57) | 1.27 (1.15-1.5) | 1.435 (1.2-1.9) | <0.001 |
| PT(sec) | 14.24 (12.8-17.135) | 14 (12.7-16.27) | 15.8 (13.4-20.618) | <0.001 |
| APTT(sec) | 36 (29.26-54.83) | 35.1 (28.93-52.95) | 38.225 (30.225-62.455) | <0.001 |
| FBG (mg/dL) | 135.33 (112-176) | 131.67 (111-169.1) | 148.415 (118.938-193) | <0.001 |
| Potassium (mEq/L) | 4.17 (3.87-4.53) | 4.15 (3.87-4.5) | 4.25 (3.885-4.65) | 0.001 |
| Sodium (mEq/L) | 138.5 (135.67-141) | 138.5 (136-141) | 138.29 (134.67-141.347) | 0.257 |
| Serum creatinine(mg/dL) | 1.2 (0.87-1.77) | 1.1 (0.85-1.6) | 1.535 (1.05-2.33) | <0.001 |
| EASIX | 1.129 (0.206-2.089) | 0.906 (0.086-1.81) | 1.903 (0.932-2.823) | <0.001 |
| LDH(U/L) | 296 (219-435) | 279 (207-393) | 380 (269-548.25) | <0.001 |
| Platelet(×103/µL) | 180 (133-237) | 181.29 (137.31-235) | 173.335 (120.502-240.378) | 0.095 |
| **Therapeutic** |  |  |  |  |
| Invasive ventilation (%) | 2212 (89.63) | 1674 (89.23) | 538 (90.88) | 0.286 |
| Antihypertensive drugs(%) | 2107 (85.37) | 1629 (86.83) | 478 (80.74) | <0.001 |
| Glucocorticoid(%) | 647 (26.22) | 410 (21.86) | 237 (40.03) | <0.001 |

Data are presented as median (IQR) or frequencies (percentages).

Abbreviation: EASIX, Endothelial Activation and Stress Index; BMI, body mass index; AKI, acute kidney injury; T2DM, type 2 diabetes mellitus; RBC, red blood cell; WBC, white blood cells; INR, international normalized ratio; PT, prothrombin time; APTT, activated partial thromboplastin time; FBG, fasting blood glucose; LDH, lactate dehydrogenase; SOFA, sequential organ failure assessment; SAPS II, simplified acute physiological score II; APS III, acute physiology score III; OASIS, oxford acute severity of illness score.


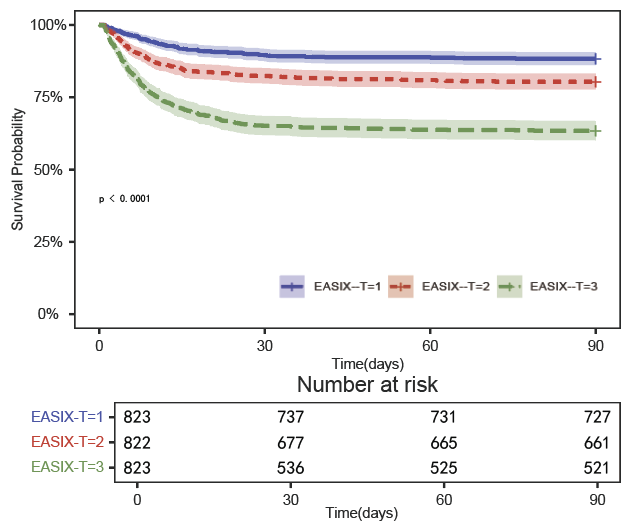


Figure S1. Kaplan-Meier survival curves comparing EASIX tertiles within 90 days after admission.


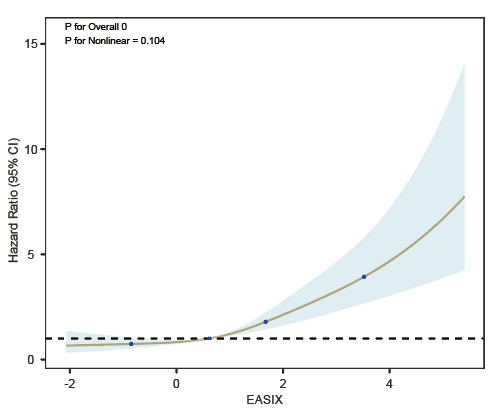


Fig S2. Restricted cubic spline analysis of EASIX and 90-day all-cause mortality in critically ill CHD based on Cox proportional hazards model 3. Cox proportional hazards model 3: adjusted for sex, age, race,BMI, respiratory failure, arterial fibrillation, hypertension, AKI, stroke, hypertension, T2DM, heart failure, myocardial infarction, hemoglobin, RBC, WBC, PT, APTT, FBG, potassium, sodium, serum creatinine, platelet, SOFA, SAPS II, APS III, OASIS, invasive ventilation, antihypertensive drug and glucocorticoid.


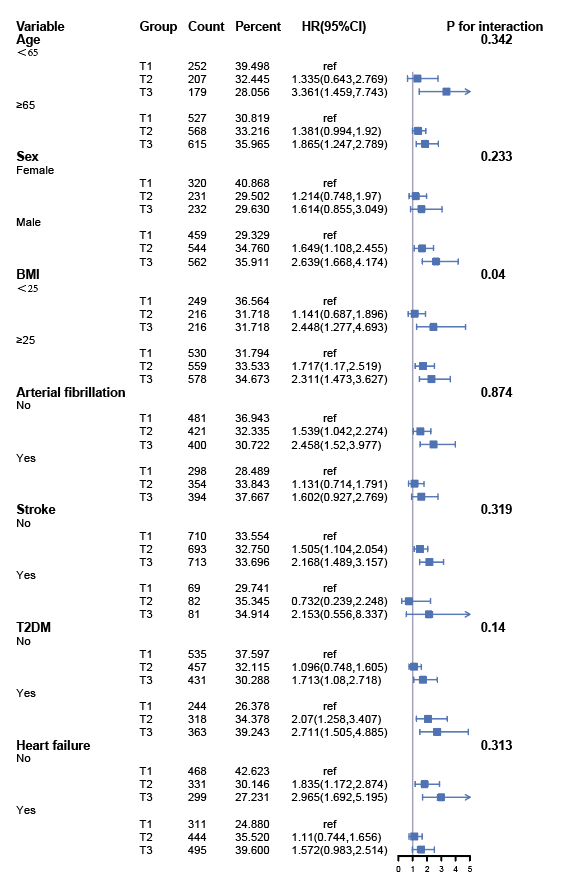


Figure S3. Subgroup analysis forest plots for 90-day mortality
